# Supplementary material for: TheC. elegansdevelopmental timing protein LIN-42 regulates diapause in response to environmental cues
Source: Oxford University Press journal article supplement (doi:10.1242/dev.048850), 2010-09-16
Supplement: dev048850supptables1.pdf [file dev048850supptables1.pdf]

**Table S1. Dauer formation in transgenic lines expressing *lin-42***

| Genotype*                                     | Array #        | GFP (+) <sup>†</sup> |      | GFP (-) <sup>‡</sup> |      | Broods scored | Animals scored <sup>§</sup> |
|-----------------------------------------------|----------------|----------------------|------|----------------------|------|---------------|-----------------------------|
|                                               |                | Dauer formation (%)  | s.d. | Dauer formation (%)  | s.d. |               |                             |
| <i>lin-42(ve11); daf-12(rh285); Ex[pHG82]</i> | <i>veEx426</i> | 3                    | 1    | 67                   | 1    | 3             | 301                         |
|                                               | <i>veEx582</i> | 6                    |      | 71                   |      | 1             | 48                          |
|                                               | <i>veEx427</i> | 8                    |      | 69                   |      | 1             | 50                          |
| <i>daf-7(e1372); Ex[Pdpy-7::lin-42C]</i>      | <i>veEx478</i> | 6                    | 6    | 97                   | 4    | 14            | 817                         |
|                                               | <i>veEx479</i> | 15                   | 11   | 99                   | 1    | 12            | 1221                        |
|                                               | <i>veEx477</i> | 26                   | 18   | 99                   | 1    | 12            | 1112                        |
| <i>daf-2(e1368); Ex[Pdpy-7::lin-42C]</i>      | <i>veEx528</i> | 25                   | 19   | 89                   | 16   | 22            | 1552                        |
|                                               | <i>veEx529</i> | 21                   | 16   | 96                   | 8    | 20            | 1019                        |
|                                               | <i>veEx530</i> | 14                   | 17   | 96                   | 9    | 18            | 498                         |
| <i>daf-2(e1370); Ex[Pdpy-7::lin-42C]</i>      | <i>veEx482</i> | 72                   | 19   | 99                   | 1    | 16            | 291                         |
|                                               | <i>veEx480</i> | 52                   | 24   | 100                  | 0    | 20            | 448                         |
|                                               | <i>veEx481</i> | 58                   | 32   | 99                   | 2    | 17            | 427                         |
|                                               | <i>veEx531</i> | 13                   | 15   | 98                   | 2    | 13            | 676                         |
|                                               | <i>veEx532</i> | 48                   | 14   | 96                   | 5    | 6             | 551                         |
| <i>daf-9(m540); Ex[Pdpy-7::lin-42C]</i>       | <i>veEx583</i> | 48                   | 25   | 97                   | 3    | 7             | 828                         |
|                                               | <i>veEx473</i> | 11                   | 9    | 93                   | 8    | 9             | 679                         |
|                                               | <i>veEx474</i> | 8                    | 12   | 88                   | 25   | 9             | 338                         |
|                                               | <i>veEx475</i> | 2                    | 4    | 83                   | 32   | 10            | 251                         |
| <i>daf-12(rh273); Ex[Pdpy-7::lin-42C]</i>     | <i>veEx520</i> | 1                    | 1    | 93                   | 8    | 9             | 687                         |
|                                               | <i>veEx521</i> | 0                    | 0    | 91                   | 3    | 11            | 649                         |
|                                               | <i>veEx522</i> | 1                    | 3    | 98                   | 3    | 6             | 292                         |
|                                               | <i>veEx523</i> | 0                    | 0    | 91                   | 11   | 8             | 285                         |
|                                               | <i>veEx524</i> | 0                    | 0    | 100                  | 0    | 4             | 141                         |

Strains were grown at 20°C except for the *daf-7* and *daf-2* lines, which were analyzed at 25°C. s.d. could not be calculated for two control strains where a single brood was assayed. The dauer formation data averaged from different strains of the same genotype are presented in Figs 1, 3 and 4.

\*Constructs were co-injected with *str-1::gfp* (100 ng/μl) which is expressed in the two AWB neurons (Troemel et al., 1997), which had no effect on dauer formation when assayed alone (see Fig. 1 legend).

<sup>†</sup>Animals carried the extrachromosomal array as determined by *str-1::gfp* expression.

<sup>‡</sup>Animals lacked the extrachromosomal array as determined by absence of *str-1::gfp* expression.

<sup>§</sup>Total number of animals scored for each transgenic line.
