# Supplementary material for: TheC. elegansdevelopmental timing protein LIN-42 regulates diapause in response to environmental cues
Source: Oxford University Press journal article supplement (doi:10.1242/dev.048850), 2010-09-16
Supplement: dev048850supptables2.pdf [file dev048850supptables2.pdf]

**Table S2. *lin-42(lf)* does not cause a SynDaf phenotype with *daf-7*, *daf-2* or other mutations for which SynDaf phenotypes have been described**

| Genotype                          | Temperature | Dauer formation (%) $\pm$ s.d. |
|-----------------------------------|-------------|--------------------------------|
| <i>daf-7(e1372)</i>               | 20°C        | 11 $\pm$ 8                     |
| <i>daf-7(e1372); lin-42(ve11)</i> | 20°C        | 11 $\pm$ 10                    |
| <i>daf-7(e1372); lin-42(RNAi)</i> | 20°C        | 17 $\pm$ 9                     |
| <i>daf-2(e1370)</i>               | 20°C        | 0                              |
| <i>daf-2(e1370); lin-42(ve11)</i> | 20°C        | 2 $\pm$ 3                      |
| <i>daf-2(e1370); lin-42(RNAi)</i> | 20°C        | 0                              |
| <i>akt-1(ok525)</i>               | 25°C        | 0                              |
| <i>akt-1(ok525); lin-42(RNAi)</i> | 25°C        | 0                              |
| <i>unc-3(e131)</i>                | 25°C        | 0                              |
| <i>unc-3(e131); lin-42(RNAi)</i>  | 25°C        | 0                              |
| <i>unc-31(e169)</i>               | 25°C        | 0                              |
| <i>unc-31(e169); lin-42(RNAi)</i> | 25°C        | 0                              |

Individual hermaphrodites were allowed to lay eggs for 12-16 hours at the indicated temperature on plates seeded with *E. coli* OP50. Two days later each brood was scored for dauer formation.  $n > 300$  for all genotypes. All RNAi experiments were repeated twice.
