# Supplementary material for: TheC. elegansdevelopmental timing protein LIN-42 regulates diapause in response to environmental cues
Source: Oxford University Press journal article supplement (doi:10.1242/dev.048850), 2010-09-16
Supplement: dev048850supptables3.pdf [file dev048850supptables3.pdf]

**Table S3. Semidominant suppression of *lin-42(lf)* by *daf-12(lbd)* mutations**

| Genotype of parent                    | Animals with L3 molt alae (%) |         |      | <i>n</i> |
|---------------------------------------|-------------------------------|---------|------|----------|
|                                       | Complete                      | Partial | None |          |
| <i>lin-42(mg152)</i>                  | 55                            | 45      | 0    | 20       |
| <i>lin-42(n1089)</i>                  | 73                            | 28      | 0    | 80       |
| <i>lin-42(ve11)</i>                   | 68                            | 31      | 0    | 60       |
| <i>lin-42(ve11); daf-12(rh193)/+</i>  | 21                            | 43      | 36   | 28       |
| <i>lin-42(n1089); daf-12(rh285)/+</i> | 10                            | 65      | 25   | 20       |
| <i>lin-42(ve11); daf-12(rh285)/+</i>  | 21                            | 41      | 38   | 34       |
| <i>lin-42(mg152); daf-12(rh61)/+</i>  | 25                            | 40      | 35   | 20       |
| <i>lin-42(n1089); daf-12(rh61)/+</i>  | 18                            | 50      | 32   | 22       |

Only non-Mig, non-SynDaf animals were scored for precocious alae formation at the L3 molt (20°C). The majority of *lin-42; daf-12* homozygotes developed into dauers and those that did not were eliminated from the analysis by their Mig phenotype. Thus, 2/3 of the scored progeny of *lin-42; daf-12/+* animals should be heterozygous for *daf-12*.
