# Supplementary figures and images for: TheC. elegansdevelopmental timing protein LIN-42 regulates diapause in response to environmental cues
Source: Oxford University Press journal article supplement (doi:10.1242/dev.048850), 2010-09-16

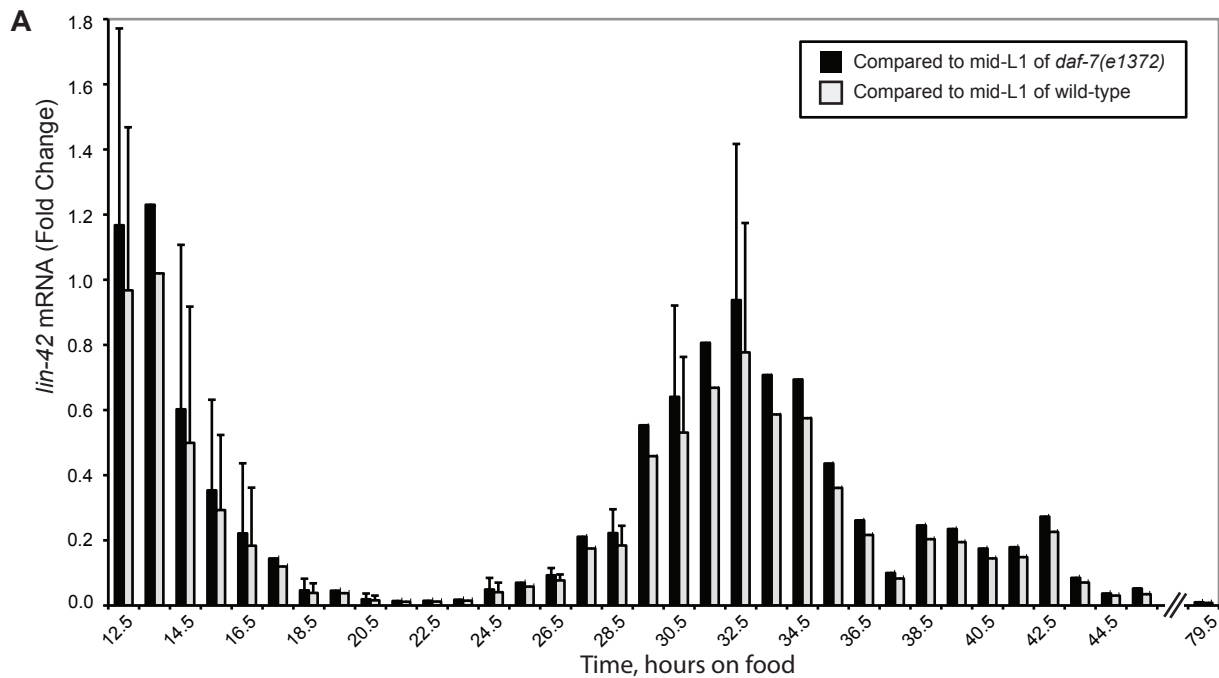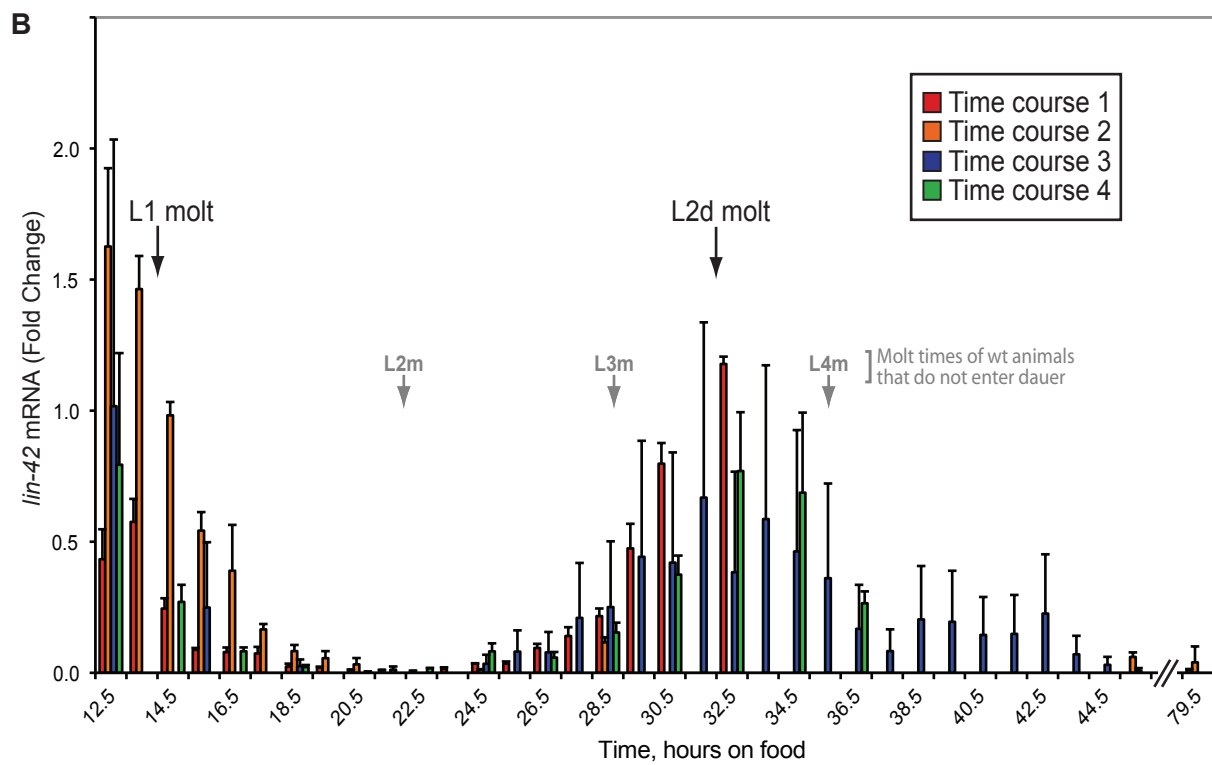

Supplement: dev048850figs1.pdf [file dev048850figs1.pdf]
